# Supplementary material for: Genomic Evidence That Governmentally Produced Cannabis sativa Poorly Represents Genetic Variation Available in State Markets
Source: Front Plant Sci. 2021 Sep 14;12:668315. doi: 10.3389/fpls.2021.668315 (PMC8476804; doi:10.3389/fpls.2021.668315)
Supplement: Supplementary file 2 [file Data_Sheet_2.xlsx]

## Sheet: TableS1_All_Info
1	2	3	4	5	6	7	8	9	10	11	12	13	14	15	16	17	18	19	20	21	22	23	24	25	26	27	28	29	30	31	32	33	34	35	36	37	38	39	40	41	42	43	44	45	46	47	48	49	50
												Heterozygosity								Principal Component Scores																				Locus 1 (CBCA-like)			Locus 2			Locus 3			Locus 4
Cultivar_name	Sample_ID	Classification	Accession	Provider	data_aligned	multiplied_by_length_of_read	genome_size	approx_coverage	total_repeat	CHLP_haplotype	MT_haplotype	O(HOM)	E(HOM)	N_SITES	F	no. het snps	missing sites	Heterozygosity	Percent_Heterozygosity	PC1	PC2	PC3	PC4	PC5	PC6	PC7	PC8	PC9	PC10	PC11	PC12	PC13	PC14	PC15	PC16	PC17	PC18	PC19	PC20	mean_depth	sd_depth	median_depth	mean_depth	sd_depth	median_depth	mean_depth	sd_depth	median_depth	mean_depth
White_widdow	A2_cats	NLMT	SRX1660624	kane	56991913	8548786950	818000000	10.4508	0.644446	I	I	5297625	4.9654e+06	7297765	0.14244	2000140	441001	0.00228248	0.228248	0.0591824	0.0548808	0.052284	0.00529321	0.00386443	0.10189	-0.0435887	-0.0418133	-0.0903244	0.0839248	-0.174674	-0.0475223	0.0691857	-0.0123786	-0.00728461	0.0617432	-0.0557918	0.0929327	0.0415826	-0.0479867	1.46566	0.9365	1.3396	1.49508	0.932088	1.531	1.08889	0.969556	0.7655	0.773949
Afghan_Kush	C1_S1ss	BLMT	SRX1660625	kane	36114325	5417148750	843000000	6.42604	0.621554	I	I	5923676	4.64879e+06	6814024	0.5888	890348	924742	0.00101603	0.101603	0.0966418	-0.219277	0.29053	0.10318	-0.0245315	-0.0583328	0.135719	-0.0923013	-0.0736328	-0.0589475	-0.0376331	-0.0316623	-0.0359474	-0.00871662	-0.0185693	-0.00962427	0.0546542	0.00465955	0.0390611	0.0248989	1.24608	0.936223	1.0893	1.46399	0.847575	1.7118	0.71965	0.698128	0.6225	0.575257
Carmagnola	C10_S10	Hemp	SRX1660626	kane	17822309	2673346350	843000000	3.17123	0.610543	I	I	5148374	3.78671e+06	5510191	0.79007	361817	2228575	0.000412891	0.0412891	-0.209902	-0.00397555	0.0634688	-0.101901	-0.097034	-0.233102	-0.0935493	0.0903992	0.0237351	-0.0229008	-0.0940575	0.0136131	0.0359122	-0.0894547	0.00313993	0.0707063	0.0624628	-0.0737214	-0.0289576	-0.00554979	0.474254	0.332504	0.6307	0.660389	0.679448	0.6307	0.612924	0.527289	0.6307	0.440656
Carmagnola	C11_S11	Hemp	SRX1660627	kane	18335922	2750388300	843000000	3.26262	0.627241	I	I	5161321	3.79582e+06	5520656	0.79167	359335	2218110	0.000410059	0.0410059	-0.207036	-0.0126611	0.0499306	-0.109375	-0.0897017	-0.201717	-0.0610317	0.0367425	-0.00100193	-0.0182167	-0.0319713	0.0290603	0.0247719	-0.072404	-0.00643714	0.0114485	0.0644137	-0.0463597	0.0243695	-0.0464588	1.00911	0.682423	0.9195	2.04721	1.41799	2.1455	1.25545	1.0934	0.9195	0.984076
Carmagnola	C12_S12	Hemp	SRX1660628	kane	18043811	2706571650	843000000	3.21064	0.618903	I	I	5133488	3.79115e+06	5513188	0.7795	379700	2225578	0.000433298	0.0433298	-0.20476	-0.00508664	0.0770057	-0.124605	-0.103568	-0.246797	-0.0929453	0.0912931	0.0322332	-0.0213552	-0.083131	0.0244531	0.0413899	-0.108014	0.0339937	0.0651476	0.0729288	-0.0534503	0.000288848	0.00612412	1.62038	1.0604	1.5573	1.92901	1.1205	2.1802	1.29691	1.10126	1.2459	1.11787
Dagestani_hemp	C13_S13	Hemp	SRX1660629	kane	49819740	7472961000	818000000	9.13565	0.628749	II	II	5737582	4.8005e+06	7048798	0.4168	1311216	689968	0.00149631	0.149631	-0.197972	-0.0288146	0.0161542	0.00693497	0.0354995	0.213129	0.0299016	-0.00911207	-0.165676	0.102424	0.337772	-0.386046	0.137585	-0.0708782	0.00675377	0.0779738	0.084839	-0.149518	-0.0312643	-0.0726682	0.423925	0.327436	0.4378	0.276936	0.227549	0.2189	0.412942	0.386988	0.3284	0.326508
Chem91	C14_S14	Hybrid	SRX1660630	kane	42275669	6341350350	818000000	7.75226	0.610378	I	I	5503273	4.78408e+06	7013278	0.32263	1510005	725488	0.00172316	0.172316	0.0691665	-0.0893983	-0.0371558	-0.090552	0.191812	0.0537634	-0.163964	0.121548	0.00863134	0.0960001	0.0717132	0.118334	-0.00160294	0.0498871	-0.0886642	0.0196506	-0.061144	-0.16423	0.0316158	0.0328995	0.477806	0.388045	0.516	0.445816	0.355807	0.387	0.460682	0.523836	0.258	0.174245
Original_Sour_Diesel	C15_S15	Hybrid	SRX1660631	kane	45329309	6799396350	818000000	8.31222	0.629591	I	I	5545353	4.85199e+06	7120576	0.30564	1575223	618190	0.00179758	0.179758	0.0870098	-0.0278371	-0.00936917	-0.0824159	0.106597	0.0470774	-0.0988994	0.174047	-0.0307346	0.00655627	0.1626	0.10724	-0.172375	-0.0684088	0.00296759	0.188199	-0.222973	-0.0524491	-0.0209227	0.013484	0.665295	0.352177	0.7218	0.558368	0.457502	0.4812	0.563909	0.454029	0.6015	0.225821
Durban_Poison	C16_S16	NLMT	SRX1660632	kane	39676228	5951434200	818000000	7.27559	0.607201	I	I	5625099	4.87467e+06	7157330	0.32875	1532231	581436	0.00174852	0.174852	0.0877057	0.125234	0.0686145	0.117857	-0.259478	0.0657128	-0.0879829	-0.0380141	0.0455117	-0.1124	-0.11379	-0.159032	0.0370668	0.0841288	-0.0373877	-0.0694146	0.034123	-0.0552492	0.0127048	-0.0645602	1.92298	1.03055	2.3366	1.73136	1.04676	1.9242	1.28695	0.824526	1.3745	1.03245
Hawaiian	C17_cat	NLMT	SRX1660633	kane	30189241	4528386150	818000000	5.53592	0.624981	I	I	5750222	4.56905e+06	6683876	0.55852	933654	1054890	0.00106545	0.106545	0.0654842	0.1494	0.00755267	-0.142721	0.271222	-0.017859	0.151179	0.198783	0.241641	-0.0234247	-0.0910123	-0.171177	0.0209764	0.0711153	0.0191395	0.0002288	0.068139	-0.0112982	0.0696784	0.00353116	1.15928	0.728386	1.2645	1.34981	0.878524	1.2645	1.04749	0.840009	0.9032	0.779806
Lebanese	C18_cat	Hybrid	SRX1660634	kane	32004095	4800614250	818000000	5.86872	0.61521	II	II	6170824	4485224	6568921	0.80895	398097	1169845	0.000454292	0.0454292	-0.0285213	0.0288846	0.0610946	0.169663	0.00842167	0.0348854	0.0525657	0.115575	-0.398697	-0.147214	-0.236699	-0.0701996	-0.218789	0.172939	0.0263171	0.364886	-0.082534	0.0543898	0.172727	-0.0662536	2.24265	1.4368	2.5559	2.49471	1.58731	2.5559	1.68498	1.12629	1.8743	0.878778
Tora_Bora	C19_cat	Hybrid	SRX1660635	kane	33836643	5075496450	818000000	6.20476	0.627757	I	I	5603876	4.61984e+06	6764174	0.4589	1160298	974592	0.00132409	0.132409	0.0320927	-0.141768	-0.233853	-0.0781003	-0.0227665	0.0226915	0.136875	-0.0124565	-0.0544851	-0.0365018	-0.252365	-0.159439	0.102587	-0.027066	-0.0494382	-0.133087	0.00568402	-0.0708257	-0.040262	-0.0438788	2.21099	1.05962	2.0952	1.78359	1.08351	1.7728	1.66214	1.14491	1.6117	0.995711
Afghan_Kush	C2_S2ss	BLMT	SRX1660636	kane	36223526	5433528900	843000000	6.44547	0.61287	I	I	6182444	4.65253e+06	6817443	0.70669	634999	921323	0.000724635	0.0724635	0.119833	-0.174234	0.29675	0.00340377	0.0873039	-0.0737057	0.00243864	-0.114629	0.0718349	-0.0158925	0.0269749	-0.0349278	0.000185484	0.0432809	0.0580767	0.0367665	0.00059965	-0.0713947	-0.0289542	0.0401378	1.68404	1.08136	1.7066	1.93574	1.47594	1.8618	1.08982	0.693304	1.2412	0.376227
G13	C20_cat	NLMT	SRX1660637	kane	29994053	4499107950	818000000	5.50013	0.621923	I	I	5469175	4.52897e+06	6618180	0.45003	1149005	1120586	0.0013112	0.13112	0.0683516	0.0793344	-0.0383781	-0.0566349	0.12387	-0.0368708	0.0222563	0.0925864	0.0293424	0.0160773	0.0103006	0.00156689	0.197638	0.103788	-0.0571151	-0.0877485	0.152417	0.0464302	0.159903	-0.0200578	0.496506	0.40405	0.3636	0.417593	0.374094	0.3636	0.399991	0.41972	0.1818	0.444255
Harlequin	C21_cat	NLMT	SRX1660638	kane	28220197	4233029550	818000000	5.17485	0.602499	I	I	5739662	4.61024e+06	6751354	0.52749	1011692	987412	0.0011545	0.11545	0.0317659	0.127154	-0.00145706	-0.0785972	-0.035391	-0.0684098	0.0150403	-0.142511	-0.122125	0.112155	0.0330754	-0.000890349	-0.0384386	0.00464132	0.0992156	0.154938	0.121863	0.216768	0.0630833	-0.0596488	1.15969	0.429448	1.1595	1.01944	0.628834	0.9662	1.20779	0.856992	1.3527	0.612845
Cannatonic	C22_S22	NLMT	SRX1660639	kane	29161329	4374199350	818000000	5.34743	0.616091	IV	I	5703373	4.61721e+06	6761571	0.50652	1058198	977195	0.00120757	0.120757	0.0592847	0.0939298	-0.0582584	0.0593067	-0.0342122	-0.155343	0.169814	-0.0292338	-0.0688105	0.0221048	0.00525013	0.121674	0.456123	0.198621	0.0812436	0.299602	-0.149403	-0.033166	0.0410149	-0.0085202	0.987392	0.439661	0.935	0.865315	0.607373	0.935	0.978031	0.854449	0.748	0.372278
Auto_AK47	C23_S23	NLMT	SRX1660640	kane	32764441	4914666150	818000000	6.00815	0.673687	I	I	5635244	4.42241e+06	6460553	0.59507	825309	1278213	0.000941809	0.0941809	-0.0168072	0.115403	-0.0170007	-0.0159705	0.0350862	-0.0117649	0.0242903	0.0679853	-0.315252	-0.116387	0.183244	0.269512	0.0265187	0.207964	-0.231539	-0.0560162	0.0731503	-0.0780871	-0.0560008	0.0215193	0.635322	0.51979	0.6658	0.411823	0.336016	0.3329	0.639293	0.563818	0.4993	0.366316
Low_Ryder	C24_S24	NLMT	SRX1660641	kane	39927334	5989100100	818000000	7.32164	0.658199	I	I	5825782	4.70202e+06	6893123	0.51288	1067341	845643	0.00121801	0.121801	0.0129077	0.104849	0.0104292	-0.0392031	-0.00177546	-0.0850719	0.0636787	-0.083936	-0.302322	-0.152451	0.197313	0.237963	0.0974449	0.125415	-0.0346682	-0.0334959	0.173242	0.0956835	-0.0661572	0.0311578	0.385358	0.294513	0.2732	0.519666	0.426757	0.5463	0.423787	0.486001	0.1366	0.397162
Pre-98_Bubba_Kush	C25_ATCACG	NLMT	SRX1660642	kane	38480436	5772065400	818000000	7.05631	0.647358	I	I	5394277	4.61351e+06	6754897	0.36461	1360620	983869	0.00155268	0.155268	0.0539092	0.0743468	-0.0269877	-0.0182833	-0.0333599	0.106804	-0.174933	-0.0843417	0.0292648	0.0178535	-0.0568501	-0.0451878	-0.140173	0.0535962	-0.00639416	0.0282263	0.0716421	-0.0645379	0.184544	0.150576	1.77965	1.23898	1.4172	1.27632	0.930105	1.1337	1.13314	0.697074	1.2755	0.578802
Jack_Herer	C27_CTATAC	NLMT	SRX1660643	kane	28818046	4322706900	818000000	5.28448	0.620332	I	I	5509042	4.50766e+06	6592041	0.48042	1082999	1146725	0.00123587	0.123587	0.058445	0.157423	0.0350818	-0.0434795	0.0866343	0.010701	0.0646115	0.142776	-0.073546	-0.147237	0.0813195	0.0460278	-0.164974	-0.0620306	-0.0200801	-0.0651067	0.051106	0.0959895	-0.0783837	-0.0562887	0.664343	0.407315	0.5677	0.414335	0.346524	0.3785	0.404741	0.392386	0.3785	0.133085
Maui_Waui	C28_CGATGT	NLMT	SRX1660644	kane	39497673	5924650950	818000000	7.24285	0.617466	I	I	5642215	4683451	6861304	0.44023	1219089	877462	0.00139118	0.139118	0.0631943	0.148462	-0.00152096	-0.120758	0.285493	-0.0111863	0.142769	0.17326	0.251606	-0.0130861	-0.0980467	-0.17965	0.00488019	0.0744349	-0.0054044	-0.015316	0.049753	-0.00144689	0.0695549	0.00796829	1.47043	0.960894	1.6568	1.72152	1.28756	2.071	1.29613	0.81766	1.2426	0.870299
Super_Lemon_Haze	C29_TTAGGC	NLMT	SRX1660645	kane	52641044	7896156600	818000000	9.653	0.629392	I	I	5904052	4.79469e+06	7033924	0.49542	1129872	704842	0.00128936	0.128936	0.0800032	0.219178	0.0894937	0.0534229	-0.0531065	0.0533256	-0.121646	-0.0325548	-0.00676964	-0.158577	-0.0950238	-0.143318	-0.0573533	0.111943	-0.00505373	0.0578064	-0.15131	-0.0685712	-0.136088	-0.0221343	1.56134	0.885519	1.6575	1.57358	1.03981	1.5539	1.06332	0.756809	1.0359	0.722433
Afghan_Kush	C3_S3ss	BLMT	SRX1660646	kane	41103250	6165487500	843000000	7.31375	0.617174	I	I	6089122	4.74867e+06	6964394	0.60497	875272	774372	0.000998825	0.0998825	0.126171	-0.157267	0.237055	-0.0508988	0.176619	-0.00112969	-0.0407112	0.011923	0.0583932	0.0868226	0.0663847	0.0682964	0.014387	-0.081854	-0.0339403	-0.0772265	-0.0809834	-0.0775576	0.0958766	-0.0236859	1.50577	1.16086	1.3673	1.19341	0.761366	1.2306	0.90266	0.722531	0.9571	0.524409
Hindu_Kush	C30_TGACCA	Hybrid	SRX1660647	kane	53276238	7991435700	818000000	9.76948	0.635544	I	I	5272817	4.87677e+06	7159726	0.17348	1886909	579040	0.00215326	0.215326	0.0692074	-0.0693767	-0.0624593	-0.122147	0.0269033	-0.0583186	0.111788	-0.180921	-0.0220947	0.0905671	-0.070768	-0.0983314	-0.0144777	-0.0501393	-0.0568877	-0.0875893	0.0872426	0.149227	0.0253598	-0.0908233	2.77567	1.64012	2.6613	3.00946	1.85529	3.4802	2.12764	1.45846	2.0472	1.41851
Somali_Taxi_Cab	C31_ACAGTG	NLMT	SRX1660648	kane	22307828	3346174200	818000000	4.09068	0.629601	I	I	5199898	3.97569e+06	5797421	0.672	597523	1941345	0.000681869	0.0681869	-0.00343037	0.0184217	-0.0875539	0.227898	-0.210948	-0.0493284	0.290322	0.222967	0.096655	0.152697	0.0411975	-0.0281873	-0.133441	-0.0804493	-0.0343504	-0.000351294	0.0653243	0.177424	0.152285	-0.119521	1.56962	1.43898	1.4667	1.47947	1.31321	0.9778	1.28	1.09867	0.9778	0.919873
Durban_Poison	C32_GCCAAT	NLMT	SRX1660649	kane	22563211	3384481650	818000000	4.13751	0.634064	I	I	5199452	4.08144e+06	5952281	0.5976	752829	1786485	0.000859098	0.0859098	0.0914727	0.13341	0.0507939	0.124585	-0.304351	0.0523409	-0.0797614	-0.0708949	0.0850521	-0.113443	-0.117721	-0.171543	0.0240899	0.100506	-0.0359654	-0.0804394	0.0415293	-0.0595727	0.00628159	-0.0764049	1.51519	0.940129	1.4501	1.51864	1.25531	1.2085	1.21511	1.04597	0.9668	0.881552
Rocky_Mountain_Bluberry	C33_CAGATC	NLMT	SRX1660650	kane	24909251	3736387650	818000000	4.56771	0.634942	I	I	5405266	4.19839e+06	6124586	0.62656	719320	1614180	0.000820859	0.0820859	0.0573298	0.108879	0.0279412	-0.0737249	0.0871407	0.00706639	-0.0223728	-0.187601	0.00382999	0.292247	-0.0290567	0.104284	-0.0178179	-0.129751	-0.167255	-0.0587661	0.0898453	0.0107655	0.0922532	-0.0889539	0.467849	0.492445	0.2189	0.352916	0.406938	0.2189	0.738736	0.745025	0.6568	0.288319
R4	C34_ACTTGA	Hybrid	SRX1660651	kane	33766281	5064942150	818000000	6.19186	0.63291	VI	I	5874729	4.45348e+06	6516302	0.68898	641573	1222464	0.000732137	0.0732137	0.0693184	-0.0481443	0.0201626	0.0902005	-0.0267823	0.083803	-0.0528435	-0.00509032	-0.121115	0.0922394	-0.123086	0.132623	0.410589	0.00486382	0.08227	-0.268234	-0.0358872	0.167662	0.0543781	-0.174365	2.40819	0.953199	2.0995	2.1774	1.08309	2.4225	1.4857	0.896287	1.7765	0.940628
Kunduz	C35_GATCAG	Hybrid	SRX1660652	kane	31566681	4735002150	818000000	5.78851	0.639661	I	I	5580764	4.33573e+06	6335618	0.62255	754854	1403148	0.000861409	0.0861409	0.0162078	-0.0638571	0.0198891	0.058365	0.0895818	0.019542	-0.224394	0.0802304	0.155368	0.157463	-0.0889136	-0.0439303	0.0620171	0.255346	0.104852	0.0487698	0.112722	0.168791	-0.591626	-0.0255047	1.44376	0.885961	1.5548	1.72819	1.17845	1.9003	1.49119	1.31127	1.2093	0.812956
Feral_Kansas	C36_TAGCTT	Hemp	SRX1660653	kane	27427186	4114077900	818000000	5.02944	0.611898	II	II	5476544	4.23292e+06	6190178	0.63539	713634	1548588	0.00081437	0.081437	-0.192214	-0.00921946	0.0119643	-0.00723956	-0.00556294	0.000354444	0.0642294	-0.0435064	0.0731981	0.0875949	0.00720026	0.0347525	-0.0984182	0.210121	0.237419	-0.176241	-0.0939241	-0.0246336	0.0121473	-0.114626	4.31053	2.37008	4.5731	4.75925	2.79944	5.1696	2.95739	2.24188	2.7836	2.27946
Kompolti	C37_GGCTAC	Hemp	SRX1660654	kane	41512635	6226895250	818000000	7.61234	0.626461	III	III	5760736	4.56346e+06	6683937	0.56462	923201	1054829	0.00105352	0.105352	-0.223008	-0.020918	0.0345345	-0.0262436	-0.00249034	-0.0241184	-0.0429913	-0.00476051	-0.0495756	0.0648994	0.0503557	-0.149263	-0.045834	0.124133	-0.216411	-0.211421	-0.297757	0.295636	-0.0216184	0.19022	2.73529	1.35379	3.0214	2.46339	1.6758	2.89	1.43249	0.986606	1.445	1.50732
Kompolti	C38_CTTGTA	Hemp	SRX1660655	kane	34885190	5232778500	843000000	6.20733	0.636169	III	III	5673469	4.45673e+06	6524296	0.58849	850827	1214470	0.00097093	0.097093	-0.212822	-0.0255282	0.0491396	-0.0307524	-0.00956627	-0.0515831	-0.0399645	-0.00118056	-0.0308029	0.0762124	0.0429902	-0.123452	-0.0577582	0.14682	-0.219296	-0.206691	-0.337951	0.324671	-0.0389922	0.23385	3.61455	1.90863	3.7053	4.48546	2.7076	5.1552	2.56804	1.75034	2.5776	1.7812
EuroOil_2	C39_AGTCAA	Hemp	SRX1660656	kane	28071279	4210691850	818000000	5.14755	0.607785	VIII	VI	5511096	4324921	6324409	0.59324	813313	1414357	0.00092812	0.092812	-0.214864	-0.0283139	0.00631341	0.00259537	0.0285003	0.212482	0.0622247	-0.12042	0.152064	-0.140708	-0.0135475	0.116861	0.031232	-0.0258694	-0.0703965	0.100922	-0.0228327	0.0686594	-0.0197321	-0.0544619	0.230033	0.258874	0.1943	0.263623	0.362573	0	0.341574	0.413977	0.1943	0.119646
Afghan_Kush	C4_S4ss	BLMT	SRX1660657	kane	46304329	6945649350	818000000	8.49101	0.624831	I	I	5827011	4.83595e+06	7100855	0.43757	1273844	637911	0.00145366	0.145366	0.112903	-0.222235	0.27413	0.0190688	0.103621	-0.0465847	-0.0127786	-0.0535636	0.0410619	-0.0186366	0.0421651	-0.00571475	0.000587506	0.0127442	0.0210726	-0.00928187	-0.050348	-0.0717194	0.0175456	0.0256361	1.34735	0.668297	1.2955	1.59359	0.998292	1.7666	0.991585	0.720631	0.9422	0.600942
Chinese_hemp	C40_AGTTCC	Hybrid	SRX1660658	kane	28234271	4235140650	818000000	5.17743	0.639189	VII	V	5393710	4.19102e+06	6119700	0.62358	725990	1619066	0.000828471	0.0828471	-0.0874541	-0.0344479	-0.0697045	0.143717	0.0176456	0.127474	0.110603	0.00449414	-0.0689774	0.103611	-0.122153	0.041445	-0.0260762	0.0361731	0.252319	-0.0588791	0.225975	-0.136067	0.0807767	0.742729	2.40872	1.86635	2.3178	2.77579	1.73431	2.8972	2.09389	1.42942	2.1246	1.09089
Colombia_Rio_Negro	C41_ATGTCA	NLMT	unasigned	kane	31208229	4681234350	818000000	5.72278	0.585974	I	I	5713970	4.50547e+06	6595601	0.57819	881631	1143165	0.00100608	0.100608	-0.00829996	0.0716419	-0.00253546	0.112516	0.00116142	0.103533	0.0605144	0.180907	-0.0428343	0.171006	-0.149983	0.109541	-0.131218	0.0194083	-0.362484	-0.251472	0.138315	-0.294065	-0.00639689	-0.157336	1.31039	0.917956	1.2232	1.48368	0.999119	1.5727	1.05314	0.812354	1.0484	0.592914
Mexican_E	C42_CCGTCC	Hybrid	unasigned	kane	34108475	5116271250	818000000	6.25461	0.621639	I	I	5738413	4.60706e+06	6749760	0.528	1011347	989006	0.00115411	0.115411	-0.0116143	-0.00089392	-0.145832	0.0687305	-0.0307259	0.074662	-0.102661	0.145081	-0.0904005	0.151078	-0.0992191	0.0314927	0.06588	0.123334	-0.220891	0.0116201	0.0685038	-0.052601	0.0918722	0.0605987	1.61486	0.690545	1.4389	1.43532	0.809786	1.4389	1.06793	0.845031	0.9593	0.694926
Girl_Scout_Cookies	C43_CGATGT	Hybrid	SRX1660661	kane	29937607	4490641050	818000000	5.48978	0.601132	I	I	5566548	4.54757e+06	6657339	0.48298	1090791	1081427	0.00124477	0.124477	0.0774979	-0.099109	-0.179766	-0.0860736	0.019143	0.0811443	-0.116344	0.0651365	-0.115694	-0.0936966	-0.0996417	-0.0461689	0.0602657	-0.0798606	0.182249	0.0056642	-0.201063	0.0634266	0.118098	-0.0212301	2.37015	1.28301	2.368	1.93884	1.1285	2.1859	1.79249	1.17916	1.8216	1.06844
Grape_Ape	C44_TTAGGC	NLMT	SRX1660662	kane	45160333	6774049950	818000000	8.28123	0.607685	I	I	5482782	4.87827e+06	7164018	0.26447	1681236	574748	0.00191856	0.191856	0.0438994	0.0721757	-0.0883372	-0.0920559	0.0609645	0.118362	-0.138438	0.00641208	-0.0914571	-0.0111406	-0.0754561	0.0234812	0.0856315	-0.122255	0.0728765	-0.0100575	-0.309072	-0.143578	0.161264	0.0700055	1.71324	0.583353	1.8113	0.924651	0.584649	0.966	1.06493	0.685478	0.966	0.769179
B-5	C45_TGACCA	NLMT	SRX1660663	kane	31493042	4723956300	818000000	5.77501	0.602888	I	I	5941192	4.60831e+06	6755150	0.62086	813958	983616	0.000928856	0.0928856	0.0291244	0.133921	0.0963966	0.0484163	0.0416751	0.0568371	0.0128119	0.0201962	-0.110125	0.193879	-0.0708025	0.157323	0.0081876	-0.207115	0.0460668	-0.0355306	-0.0855482	-0.0548154	-0.380689	-0.048912	1.17039	0.604032	1.039	1.19528	0.755398	1.3853	1.06745	0.744634	1.2121	0.520971
Chocolope	C46_ACAGTG	NLMT	SRX1660664	kane	31233690	4685053500	818000000	5.72745	0.610568	I	I	5758997	4.64737e+06	6810896	0.5138	1051899	927870	0.00120038	0.120038	0.103651	0.0988321	0.0337725	-0.00470732	-0.145742	-0.0107121	-0.0248627	-0.0251146	0.0909333	-0.11875	0.197675	0.0404202	0.103395	-0.122999	0.031259	-0.137545	-0.130453	-0.0239927	0.0388062	0.120674	1.90479	0.872957	1.9206	1.99636	1.05814	2.0952	1.56019	1.03968	1.746	1.16364
Alaskan_Thunderfuck	C47_GCCAAT	Hybrid	SRX1660665	kane	32127030	4819054500	818000000	5.89126	0.604872	I	I	5572198	4.62945e+06	6783426	0.43768	1211228	955340	0.0013822	0.13822	-0.013664	0.00938589	-0.0598966	0.0657722	0.0240529	0.0587022	0.0541561	-0.0255193	-0.0839665	0.218035	-0.142696	0.0955982	0.0373345	-0.213429	0.197009	0.0363925	0.0560491	0.032363	-0.228073	0.135514	0.863249	0.554138	0.679	0.691548	0.533745	0.679	0.530929	0.497288	0.5092	0.4132
Blueberry_DJ	C48_CAGATC	NLMT	SRX1660666	kane	39671296	5950694400	818000000	7.27469	0.620334	I	I	5972414	4.8271e+06	7088656	0.50643	1116242	650110	0.00127381	0.127381	0.0510421	0.146657	-0.0496707	-0.178235	0.0274021	-0.000142255	-0.0285538	-0.156601	-0.0392316	0.0242362	0.0158477	-0.0240579	-0.112272	-0.100451	0.0740669	-0.0785441	0.181269	0.151627	0.00622889	0.0436598	2.31694	0.989827	2.3369	2.1046	1.05434	2.3369	1.91599	1.42027	1.9245	1.56183
Blue_Dream	C49_ACTTGA	NLMT	SRX1660667	kane	31382268	4707340200	818000000	5.75469	0.625229	I	I	5652945	4.61404e+06	6756210	0.48498	1103265	982556	0.001259	0.1259	0.0760341	0.161083	0.0077832	-0.0861619	0.175081	0.00918985	0.0633175	0.199122	0.0591289	-0.140203	0.0403891	-0.0499728	-0.0369711	-0.0274936	0.0871322	0.0219919	-0.0351131	0.0578764	-0.0238768	-0.0197854	1.44076	0.678694	1.5639	1.52895	0.851545	1.5639	0.992891	0.935332	0.5213	0.576823
Liberty_Haze	C50ssar	NLMT	SRX1660668	kane	41053996	6158099400	818000000	7.52824	0.616009	I	I	5682186	4.36249e+06	6377949	0.65479	695763	1360817	0.000793977	0.0793977	0.0691971	0.140392	0.0409413	-0.106045	0.0883399	-0.00528198	0.0865851	-0.0684784	-0.0290981	0.0867826	-0.0707458	-0.0390485	0.109896	-0.111491	0.151538	0.0645886	-0.0241871	0.195382	0.124055	-0.0228765	1.25362	0.761204	1.1503	2.05508	1.47063	1.82135	1.30757	0.917199	1.1503	0.99487
Tangerine_Haze	C51ssar	NLMT	SRX1660669	kane	26382231	3957334650	818000000	4.83782	0.615574	I	I	5416013	4174159	6090784	0.64794	674771	1647982	0.000770021	0.0770021	0.089249	0.0560949	0.00540141	0.0324117	-0.179928	0.105248	-0.126388	0.0839728	0.0649512	0.12513	0.0521963	0.132495	0.0644175	-0.141786	0.0126581	-0.064337	-0.120952	-0.195012	0.0326504	-0.00950222	0.955378	0.634052	1.0335	1.08549	0.636318	1.2402	0.812641	0.543864	0.8268	0.779952
Sievers_Infinity	C52ssar	Hemp	SRX1660670	kane	21175153	3176272950	818000000	3.88297	0.596412	II	II	5751826	4.49215e+06	6580865	0.60309	829039	1157901	0.000946066	0.0946066	-0.196178	-0.0264824	0.00506913	-0.015623	0.0135983	0.211099	0.0389485	-0.0147784	-0.159413	0.109247	0.36628	-0.407899	0.137223	-0.0890598	0.0160264	0.0849545	0.107021	-0.157947	-0.0525578	-0.0869722	1.21789	0.632527	1.0301	1.19988	1.04312	0.7726	1.15047	0.805493	1.0301	0.344066
Skunk_1	C53ssar	NLMT	SRX1660671	kane	31481485	4722222750	818000000	5.77289	0.625115	I	I	5940011	4.77106e+06	7001547	0.52408	1061536	737219	0.00121138	0.121138	0.0844072	0.186928	0.0921371	-0.0395393	-0.113532	0.0896275	-0.138206	-0.14608	-0.054247	-0.0699556	-0.129197	-0.11195	-0.176474	0.00572173	0.0528674	0.0462961	0.0198093	-0.0363101	-0.155795	-0.0313723	0.234767	0.279446	0.1732	0.304012	0.243184	0.3464	0.300777	0.289994	0.1732	0.190236
OG_Kush	C54ssar	BLMT	SRX1660672	kane	34794789	5219218350	818000000	6.38046	0.636925	I	I	5463498	4.02925e+06	5874851	0.77712	411353	1863915	0.000469419	0.0469419	0.114607	-0.246903	-0.116983	-0.0285297	-0.0944592	0.0347959	-0.200265	0.116772	0.0683142	-0.0126302	0.105344	0.0290305	0.00338698	0.131818	0.0269275	0.0905059	0.0961714	0.0910262	0.0307005	-0.018703	1.4328	0.599643	1.4106	1.27023	0.789168	1.4106	1.19919	0.881299	1.0971	0.731282
Golden_Goat	C55ssar	NLMT	SRX1660673	kane	21571390	3235708500	818000000	3.95563	0.596049	I	I	5646418	4.46156e+06	6527859	0.57342	881441	1210907	0.00100586	0.100586	0.0803243	0.132644	-0.00267379	-0.0550368	0.0771299	-0.00594732	0.0764311	0.16181	-0.0301568	-0.256169	0.158244	0.0669534	0.00604567	-0.0803909	0.0536135	-0.142781	0.0482988	0.0731581	-0.0888276	0.0387752	1.70312	0.734002	1.7696	1.19206	0.893086	1.264	1.00919	0.583958	1.0112	0.601875
Feral_Nebraska	C56ssar	Hemp	SRX1660674	kane	25518482	3827772300	818000000	4.67943	NA	II	II	4227297	3.0579e+06	4432889	0.85048	205592	3305877	0.000234613	0.0234613	-0.164776	0.00286141	-0.0090039	-0.0389897	-0.0666014	-0.0223373	0.124733	-0.0800494	0.0649904	0.068028	0.091443	0.150739	-0.14632	0.261158	0.354615	-0.134166	-0.0429704	-0.159962	0.00634785	-0.199395	0.430931	0.278553	0.4274	0.57257	0.495572	0.4274	0.434197	0.482514	0.4274	0.147148
Feral_Nebraska	C57ssar	Hemp	SRX1660675	kane	12509951	1876492650	818000000	2.294	0.524539	II	II	5549192	4242747	6208765	0.66451	659573	1530001	0.000752678	0.0752678	-0.169511	-0.0281101	-0.0197857	0.00303049	0.00335251	0.0600958	0.117002	-0.0119429	0.0218405	0.0586609	0.027519	0.0921927	-0.170979	0.251169	0.300384	-0.172305	-0.117151	-0.123465	0.128521	-0.163034	1.88312	1.17391	1.7437	2.21561	1.25067	2.6155	1.55705	1.45182	1.3078	1.4802
Afghan_Kush	C5ssare	BLMT	SRX1660676	kane	28444137	4266620550	818000000	5.21592	0.630171	I	I	5936543	4.73236e+06	6943790	0.54453	1007247	794976	0.00114943	0.114943	0.111716	-0.228949	0.268586	0.0948499	-0.0087754	-0.0279077	0.0663625	-0.0135254	0.0063341	-0.0241772	0.0352812	0.0111165	-0.0120617	-0.0352904	-0.029747	-0.0194386	-0.0339244	-0.0427407	0.0772536	0.0344555	0.0158284	0.0527776	0	0.00716087	0.036363	0	0.010435	0.0435048	0	0.0834235
Afghan_Kush	C6ssare	BLMT	SRX1660677	kane	38552846	5782926900	818000000	7.06959	0.628988	I	I	6092760	4.68431e+06	6869667	0.6445	776907	869099	0.000886575	0.0886575	0.0901536	-0.181844	0.239373	0.034514	0.0297775	-0.0470382	0.168961	-0.104013	-0.137766	-0.0058785	-0.0999172	-0.046718	-0.0798001	-0.062411	-0.0646414	-0.0292155	0.0927839	0.0690366	0.012642	-0.0425819	0.875886	0.681845	0.8487	0.997531	0.614837	0.9902	0.739452	0.613875	0.7073	0.679123
Carmagnola	C7ssare	Hemp	SRX1660678	kane	34235262	5135289300	818000000	6.27786	0.618164	I	I	5831671	4.55412e+06	6669483	0.60394	837812	1069283	0.000956077	0.0956077	-0.214635	-0.0185356	0.0538193	-0.0978957	-0.0381393	-0.134855	-0.104698	0.0878167	0.0437147	-0.0506033	-0.110749	0.0120718	0.0621085	-0.0936818	-0.0361769	0.0625749	0.0412488	-0.0353623	0.0222307	-0.0128454	1.08735	0.677118	1.115	1.65558	1.09647	1.5929	0.946389	0.739593	0.7964	0.72914
Carmagnola	C8ssare	Hemp	SRX1660679	kane	29033465	4355019750	818000000	5.32399	0.611653	I	I	5694799	4.42199e+06	6462938	0.62364	768139	1275828	0.000876569	0.0876569	-0.216782	-0.0187262	0.0614959	-0.10333	-0.0646941	-0.182463	-0.109293	0.0991222	0.00216147	-0.026482	-0.0985801	0.0229611	0.031967	-0.104728	0.00381592	0.060002	0.0462499	-0.0755854	0.0515978	0.00909612	3.56577	1.78574	3.7566	4.0773	2.1477	4.8836	2.61341	1.80446	2.8174	1.6134
Carmagnola	C9ssare	Hemp	SRX1660680	kane	21483701	3222555150	818000000	3.93955	0.614526	I	I	5441434	4.09242e+06	5965714	0.72013	524280	1773052	0.000598287	0.0598287	-0.217425	-0.0125195	0.0469899	-0.116354	-0.0891609	-0.223405	-0.0870816	0.0828544	0.0058501	-0.0319759	-0.0442844	-0.00399876	0.0282013	-0.097393	-0.0135714	0.0109844	0.074057	-0.0305944	0.0282921	0.00433538	1.2299	0.702081	1.2692	1.68302	1.31699	1.7769	0.745196	0.656419	0.7615	1.02657
chemdawg	chemdawg_5x	NLMT	Medicinal Genomics	Medicinal Genomics	39865110	5979766500	818000000	7.31023	0.596674	I	I	5669726	4.64455e+06	6804130	0.47471	1134404	934636	0.00129454	0.129454	0.112709	0.0299818	0.0166748	0.025014	-0.162372	0.0443839	-0.0461204	0.048309	0.109536	0.0910897	0.095506	0.0555037	-0.0873134	-0.135191	0.0419631	0.150094	-0.163688	0.0213069	-0.0146052	-0.00263618	1.57938	0.826494	1.3679	1.37807	0.779794	1.3679	1.40392	0.896511	1.5047	0.940928
Chocolope	chocolope_g	NLMT	Medicinal Genomics	Medicinal Genomics	38633315	5794997250	818000000	7.08435	0.659139	I	I	5531049	4.17963e+06	6103131	0.70258	572082	1635635	0.000652837	0.0652837	0.120915	0.101175	0.0102876	0.0405069	-0.209722	-0.1109	0.0713376	-0.0922217	0.184013	-0.19873	0.19551	-0.0117476	0.201329	0.0305667	0.00819516	-0.133026	0.0225124	-0.0316153	-0.0233471	0.141957	1.10214	0.59887	1.1292	1.05901	0.653513	0.9881	0.814045	0.586216	0.7058	0.629212
Dr._Grinspoon	drgrinspoon	NLMT	Medicinal Genomics	Medicinal Genomics	30433426	4565013900	818000000	5.5807	0.632265	I	I	5752178	4.48479e+06	6569300	0.608	817122	1169466	0.000932467	0.0932467	0.01889	0.0146159	-0.0370707	0.299568	-0.126896	-0.0963144	0.276814	0.266489	0.0531824	-0.0342275	0.0753424	-0.0232079	-0.101942	-0.201613	-0.00237921	0.0386684	-0.113157	0.0141448	-0.155661	0.0830545	0.889156	0.557721	0.7168	0.463001	0.465332	0.3584	0.532759	0.603341	0.3584	0.223361
Finola	finolas	Hemp	PRJNA73819	page	84589803	8458980300	818000000	10.3411	0.632687	II	II	5749212	4.78107e+06	7017349	0.43293	1268137	721417	0.00144715	0.144715	-0.238841	-0.0573733	0.00125693	0.0522345	0.08016	0.348397	0.0654832	-0.135067	0.200154	-0.231919	-0.0684935	0.204208	0.0484825	-0.0573809	-0.132193	0.0955367	-0.0151755	0.0775815	0.00066346	-0.0406428	1.92427	1.32671	1.6439	2.16798	1.44746	2.2241	1.34234	0.961152	1.2571	0.961832
Green_Crack	green_crack	NLMT	Medicinal Genomics	Medicinal Genomics	82453088	12367963200	818000000	15.1198	0.71399	I	I	5275814	4301179	6291824	0.48961	1016010	1446942	0.00115943	0.115943	0.0808099	0.169402	-0.0312377	-0.0784742	-0.0761575	-0.00314021	-0.118083	-0.235234	0.122323	0.0422853	0.0652381	-0.0208195	-0.125526	0.0259699	-0.082084	-0.00585025	0.0599158	-0.0897466	0.121521	0.0937566	1.05647	0.690262	0.9921	1.14912	0.973356	0.7937	0.622346	0.488562	0.5291	0.726097
Kandy_Kush	kandy_kush	Hybrid	Medicinal Genomics	Medicinal Genomics	36883170	5532475500	818000000	6.76342	0.68023	I	I	4862744	3.77595e+06	5489107	0.63438	626363	2249659	0.00071478	0.071478	0.0540705	-0.057784	-0.124442	0.0276341	-0.194697	0.0447617	-0.0477461	0.0612931	0.0898871	0.212837	0.164386	0.0808485	-0.120246	-0.113198	0.0420045	0.0667763	0.0729104	0.30283	0.160816	-0.0857309	1.76114	1.0876	1.6264	1.61572	1.02658	1.6264	1.13084	0.723401	1.1828	1.14861
OG_Kush	OG_kush	BLMT	Medicinal Genomics	Medicinal Genomics	17645709	2646856350	818000000	3.23577	0.651451	I	I	3763622	2.76861e+06	3987089	0.8166	223467	3751677	0.000255012	0.0255012	0.0964165	-0.188039	-0.266952	-0.137116	-0.0883473	-0.0760106	0.161227	-0.0867899	-0.0118818	-0.0872287	-0.0518621	-0.0544366	-0.023834	-0.0227475	-0.0402532	-0.0190133	-0.0495566	-0.104228	-0.132588	-0.0182488	0.686312	0.608819	0.6181	0.750848	0.652458	0.6181	0.861686	0.748336	0.6181	0.520697
Purple_Kush	PK_cats	BLMT	PRJNA73819	page	52725528	5272552800	818000000	6.44566	0.630438	I	I	4919322	4.31875e+06	6307837	0.30193	1388515	1430929	0.00158452	0.158452	0.0825072	-0.20772	-0.228318	-0.121394	-0.0111244	-0.00618662	0.0975348	-0.0241099	-0.0592616	-0.107126	-0.0830487	-0.0582581	-0.00637979	-0.0370767	-0.0388784	-0.0470136	-0.0611149	-0.061642	-0.0939511	-0.0166755	2.35134	1.59481	1.7066	2.25774	1.46416	2.172	1.57704	1.38769	1.2411	0.97469
US031	USO31ss	Hemp	PRJNA73819	page	45479505	4547950500	818000000	5.55984	0.616089	II	II	5828478	4.42865e+06	6481115	0.68202	652637	1257651	0.000744763	0.0744763	-0.219094	-0.0529612	-0.000578097	0.0334387	0.0240328	0.324067	0.0941355	-0.133696	0.211628	-0.206556	-0.0614566	0.190772	0.0471906	-0.118175	-0.0939316	0.148787	0.0843701	0.0912593	-0.00515603	-0.011589	5.75864	3.35688	5.5757	5.28841	3.42891	5.5757	3.22837	1.85259	3.5972	2.21302
Recon	reconss	NLMT	Medicinal Genomics	Medicinal Genomics	29744553	4461682950	818000000	5.45438	0.705302	I	I	4066584	3.13467e+06	4542152	0.66211	475568	3196614	0.000542699	0.0542699	0.0352539	-0.00138524	-0.152323	-0.195273	0.0188735	-0.119382	0.0498293	-0.248533	-0.0564722	0.00249566	0.117267	0.0943493	-0.264479	-0.0267212	-0.076496	0.0834536	-0.0304855	-0.0563686	-0.0963225	0.0302441	0.149667	0.184451	0.1833	0.146398	0.229206	0	0.0895909	0.15411	0	0.148086
Tunas_Banana	RSP11028_Tu	BLMT	Medicinal Genomics	Medicinal Genomics	43210759	6481613850	818000000	7.92373	0.612168	I	I	5177583	4.37468e+06	6394587	0.39749	1217004	1344179	0.0013888	0.13888	0.0787383	-0.133248	-0.0317053	0.013331	-0.0286241	0.0561006	-0.131021	0.136236	0.0333348	-0.0860981	0.0564498	0.0169131	-0.0640874	0.138887	0.030969	0.0219352	0.297455	0.0843646	-0.0110225	0.0246492	1.17827	0.792676	1.0096	0.862624	0.558344	0.8834	0.829757	0.540494	0.8834	0.45046
SVG_OG	MG_SVG_OG_2	BLMT	Medicinal Genomics	Medicinal Genomics	38187518	5728127700	818000000	7.0026	0.607344	I	I	5866254	4.60589e+06	6749422	0.58798	883168	989344	0.00100784	0.100784	0.107303	-0.254683	-0.113674	-0.0144374	-0.0576724	0.0469524	-0.214119	0.123435	0.0575227	-0.022366	0.0955019	0.0218174	-0.00307141	0.126749	0.00738232	0.0804958	0.0881466	0.0937189	0.0317229	-0.0136255	2.20083	1.40713	1.9993	2.07294	1.169	2.2849	1.53057	1.3199	1.1424	0.954171
Jamaican_Lion	JML_MISEQ13	NLMT	Medicinal Genomics	Medicinal Genomics	11587513	1738126950	818000000	2.12485	NA	V	IV	509869	427296	624341	0.41906	114472	7114425	0.000130631	0.0130631	0.0341186	0.0840366	-0.0680658	0.0806646	0.0247137	-0.176971	0.175617	-0.168009	0.228797	0.264038	0.0483356	0.0192333	0.0712216	0.240539	-0.23667	0.354826	-0.10834	-0.107852	-0.0363147	0.072943	8.74838	11.2371	2.8237	9.77216	14.3393	1.8825	9.15942	8.9129	7.0593	7.47531
LA_confidential	LA_conf_med	BLMT	Medicinal Genomics	Medicinal Genomics	31479564	4721934600	818000000	5.77254	0.682359	I	I	4399846	3.38533e+06	4905653	0.6673	505807	2833113	0.000577207	0.0577207	0.0928103	-0.194447	-0.263906	-0.12726	-0.063735	-0.0621967	0.143333	-0.0857401	-0.0165251	-0.0931887	-0.0557956	-0.0560109	-0.0313022	-0.0257799	-0.0591531	-0.0250593	-0.0628752	-0.0966553	-0.120409	-0.0126063	0.513657	0.441248	0.3465	0.863514	0.951494	0.5197	0.57384	0.476242	0.5197	0.473945
NIDA_THC2	NIDA_THC2_U	Hybrid		sh	98869318	14830397700	818000000	18.1301	0.613423	I	I	4679950	4.35815e+06	6373886	0.15964	1693936	1364880	0.00193305	0.193305	-0.054918	0.0141083	-0.202976	0.426679	0.285944	-0.229772	-0.199349	-0.172269	0.0238116	-0.0941459	0.0484939	-0.0423177	-0.0366116	-0.108873	0.035577	-0.0621962	0.0139792	-0.0173315	0.0424423	-0.0792837	0.360796	0.321634	0.2206	0.6021	0.542146	0.4964	0.456336	0.5001	0.2758	0.234555
NIDA_THC_CBD2	NIDA_THC_CB	Hybrid		sh	112851880	16927782000	818000000	20.6941	0.609989	I	I	4827191	4.48908e+06	6571165	0.16239	1743974	1167601	0.00199015	0.199015	-0.0558723	0.00778255	-0.203965	0.431324	0.283231	-0.224743	-0.197346	-0.159882	0.0180724	-0.0967142	0.04484	-0.0483262	-0.0320005	-0.112369	0.0281637	-0.0672449	0.00685024	-0.0107404	0.0532945	-0.0779572	0.347272	0.269254	0.3383	0.476631	0.476702	0.3383	0.442911	0.499292	0.2899	0.22249
		12	10	57				479.038
		16		11						58	60
		14	61	3						8	8
		31	59	2						2	2
		73	57	73						1	1
			`							1	1
										1	1
										1	0
										1	0
										73	73
										79.4521	82.1918
[truncated: 35 more columns]

## Sheet: TableS2_Population_assignment
name	id	Hemp	BLMT	NLMT	classification
White_widdow	A2_cats	0.062	0.214	0.724	NLMT
Afghan_Kush	C1_S1ss	0	1	0	BLMT
Carmagnola	C10_S10	1	0	0	Hemp
Carmagnola	C11_S11	1	0	0	Hemp
Carmagnola	C12_S12	1	0	0	Hemp
Dagestani_hemp	C13_S13	0.982	0.001	0.017	Hemp
Chem91	C14_S14	0.041	0.559	0.401	Hybrid
Original_Sour_Diesel	C15_S15	0.012	0.42	0.569	Hybrid
Durban_Poison	C16_S16	0	0.103	0.897	NLMT
Hawaiian	C17_cat	0	0.012	0.988	NLMT
Lebanese	C18_cat	0.247	0.2	0.553	Hybrid
Tora_Bora	C19_cat	0.156	0.56	0.284	Hybrid
Afghan_Kush	C2_S2ss	0	1	0	BLMT
G13	C20_cat	0.008	0.134	0.857	NLMT
Harlequin	C21_cat	0.09	0.013	0.898	NLMT
Cannatonic	C22_S22	0.055	0.124	0.821	NLMT
Auto_AK47	C23_S23	0.24	0.006	0.754	NLMT
Low_Ryder	C24_S24	0.189	0.021	0.79	NLMT
Pre-98_Bubba_Kush	C25_ATCACG	0.052	0.158	0.79	NLMT
Jack_Herer	C27_CTATAC	0	0.018	0.982	NLMT
Maui_Waui	C28_CGATGT	0.004	0.026	0.97	NLMT
Super_Lemon_Haze	C29_TTAGGC	0	0	1	NLMT
Afghan_Kush	C3_S3ss	0	0.923	0.077	BLMT
Hindu_Kush	C30_TGACCA	0.069	0.503	0.428	Hybrid
Somali_Taxi_Cab	C31_ACAGTG	0.237	0.158	0.605	NLMT
Durban_Poison	C32_GCCAAT	0	0.065	0.935	NLMT
Rocky_Mountain_Bluberry	C33_CAGATC	0.041	0.093	0.866	NLMT
R4	C34_ACTTGA	0.012	0.513	0.475	Hybrid
Kunduz	C35_GATCAG	0.2	0.455	0.346	Hybrid
Feral_Kansas	C36_TAGCTT	0.938	0	0.062	Hemp
Kompolti	C37_GGCTAC	1	0	0	Hemp
Kompolti	C38_CTTGTA	1	0	0	Hemp
EuroOil_2	C39_AGTCAA	0.997	0	0.003	Hemp
Afghan_Kush	C4_S4ss	0	1	0	BLMT
Chinese_hemp	C40_AGTTCC	0.488	0.187	0.324	Hybrid
Colombia_Rio_Negro	C41_ATGTCA	0.238	0.08	0.683	NLMT
Mexican_E	C42_CCGTCC	0.262	0.215	0.522	Hybrid
Girl_Scout_Cookies	C43_CGATGT	0.019	0.541	0.44	Hybrid
Grape_Ape	C44_TTAGGC	0.111	0.117	0.772	NLMT
B-5	C45_TGACCA	0.113	0.033	0.854	NLMT
Chocolope	C46_ACAGTG	0	0.131	0.869	NLMT
Alaskan_Thunderfuck	C47_GCCAAT	0.25	0.208	0.542	Hybrid
Blueberry_DJ	C48_CAGATC	0.037	0	0.963	NLMT
Blue_Dream	C49_ACTTGA	0	0.019	0.981	NLMT
Liberty_Haze	C50ssar	0.004	0.029	0.967	NLMT
Tangerine_Haze	C51ssar	0	0.209	0.791	NLMT
Sievers_Infinity	C52ssar	1	0	0	Hemp
Skunk_1	C53ssar	0	0	1	NLMT
OG_Kush	C54ssar	0	1	0	BLMT
Golden_Goat	C55ssar	0	0.049	0.951	NLMT
Feral_Nebraska	C56ssar	0.868	0	0.132	Hemp
Feral_Nebraska	C57ssar	0.839	0.066	0.095	Hemp
Afghan_Kush	C5ssare	0	1	0	BLMT
Afghan_Kush	C6ssare	0	0.927	0.073	BLMT
Carmagnola	C7ssare	1	0	0	Hemp
Carmagnola	C8ssare	1	0	0	Hemp
Carmagnola	C9ssare	1	0	0	Hemp
chemdawg	chemdawg_5x	0	0.315	0.685	NLMT
Chocolope	chocolope_g	0	0.123	0.877	NLMT
Dr._Grinspoon	drgrinspoon	0.144	0.238	0.618	NLMT
Finola	finolas	0.979	0.021	0	Hemp
Green_Crack	green_crack	0	0	1	NLMT
Jamaica_Lion	JML_MISEQ13	0.083	0.097	0.82	NLMT
Kandy_Kush	kandy_kush_	0.114	0.43	0.456	Hybrid
LA_confidential	LA_conf_med	0	0.84	0.16	BLMT
unknown	MG_SVG_OG_2	0	0.999	0.001	BLMT
NIDA_THC_CBD2	NIDA_THC_CB	0.39	0.165	0.445	Hybrid
NIDA_THC2	NIDA_THC2_U	0.384	0.158	0.459	Hybrid
OG_Kush	OG_kush	0	0.853	0.147	BLMT
Purple_Kush	PK_cats	0.018	0.826	0.157	BLMT
Recon	reconss	0.117	0.278	0.605	NLMT
Tunas_Banana	RSP11028_Tu	0.047	0.668	0.285	BLMT
US031	USO31ss	1	0	0	Hemp
				nlmt	31
				hemp	16
				hybrid	14
				blmt	12

## Sheet: TableS3_cannabinoid_blast_hits
				THCAS			CBDAS				CBCAS
Assembly	Number of hits	subject id	s. start	s. end	% identity	alignment length	s. end	% identity	alignment length	blast_hit_order	s.end	% identity	alignment length	blast hit order
Grassa et al. 2018 http://dx.doi.org/10.1101/458083	1	9	25821957	25823591	97.61	1635	25823594	89.15	1640	4	25823591	99.76	1635	1
	2	9	26045537	26047170	97.19	1637	26047173	88.92	1642	5	26047170	99.33	1637	2
	3	9	25982099	25983733	96.82	1637	25983736	88.55	1642	8	25983733	98.96	1637	3
	4	9	26085884	26087511	96.27	1636	26087514	88.71	1639	7	26087511	98.41	1636	4
	5	9	25916410	25917565	95.52	1161	25917565	88.11	1161	9	25917565	97.85	1161	5
	6	9	26171983	26173594	93.56	1646	26173597	86.36	1650	11	26173594	95.57	1646	6
	7	9	29636867	29635233	92.29	1635	29635230	90.23	1638	2	29635233	91.87	1635	7
	8	9	25870545	25872179	92.01	1640	25872182	86.25	1644	12	25872179	91.6	1642	8
	9	9	29670996	29669365	91.69	1637	29669362	89.44	1639	3	29669365	91.2	1637	9
	10	9	29701184	29699555	91.14	1636	29699552	88.77	1639	6	29699555	90.71	1636	10
	11	9	29577880	29576253	90.06	1640	29576250	88.08	1644	10	29576253	89.76	1640	11
	12	9	30982731	30981100	89.68	1637	30981097	100	1635	1	30981100	89.25	1637	12
		Number of hits	subject id	s. start	end	length
		1	9	25821957	25823594	1637
		2	9	26045537	26047173	1636
		3	9	25982099	25983736	1637
		4	9	26085884	26087514	1630
		5	9	25916410	25917565	1155
		6	9	26171983	26173597	1614
		7	9	29636867	29635230	-1637
		8	9	25870545	25872182	1637
		9	9	29670996	29669362	-1634
		10	9	29701184	29699552	-1632
		11	9	29577880	29576250	-1630
		12	9	30982731	30981097	-1634

## Sheet: TableS4_RepeatFamilies.csv
Automatic_annotation	A2_cat	C10_S10	C11_S11	C12_S12	C13_S13	C14_S14	C15_S15	C16_S16	C17_cat	C18_cat	C19_cat	C1_S1	C20_cat	C21_cat	C22_S22	C23_S23	C24_S24	C25_ATCACG_L008	C27_CTATAC_L004	C28_CGATGT_L008	C29_TTAGGC_L008	C2_S2	C30_TGACCA_L008	C31_ACAGTG_L008	C32_GCCAAT_L008	C33_CAGATC_L008	C34_ACTTGA_L008	C35_GATCAG_L008	C36_TAGCTT_L008	C37_GGCTAC_L008	C38_CTTGTA_L008	C39_AGTCAA_L008	C3_S3	C40_AGTTCC_L008	C41_ATGTCA_L008	C42_CCGTCC_L008	C43_CGATGT_L004	C44_TTAGGC_L004	C45_TGACCA_L004	C46_ACAGTG_L004	C47_GCCAAT_L004	C48_CAGATC_L004	C49_ACTTGA_L004	C4_S4	C5	C50	C51	C52	C53
All	0.285426	0.275581	0.246478	0.269126	0.292306	0.322653	0.289427	0.298978	0.285573	0.27032	0.275791	0.249435	0.259109	0.285928	0.258521	0.271562	0.255292	0.27019	0.297089	0.286022	0.302336	0.25519	0.279416	0.306833	0.303275	0.287019	0.277855	0.306868	0.306432	0.260137	0.29543	0.282669	0.295392	0.295839	0.235433	0.311981	0.291823	0.296191	0.309626	0.288558	0.335495	0.307202	0.305464	0.280366	0.296644	0.301504	0.283119	0.318685	0.299557
All/contamination
All/organelle/plastid	0.0797058	0.0409492	0.0630849	0.0435417	0.052411	0.0287322	0.0715614	0.0488033	0.0732883	0.0425345	0.0684775	0.0611253	0.0682032	0.0518504	0.0657578	0.177567	0.165376	0.105865	0.0474519	0.0538424	0.0381886	0.0635359	0.0267966	0.0222349	0.0432104	0.0280388	0.0424955	0.0396387	0.0058796	0.0723689	0.067416	0.038281	0.0697556	0.0728133	0.0473407	0.0658536	0.0410911	0.0409148	0.0417213	0.0584699	0.0404485	0.0345518	0.0356663	0.0667338	0.077581	0.025961	0.0661857	0.0527304	0.059652
All/repeat
All/repeat/mobile_element/Class_I/LTR	0.0127386	0.0412256	0.0467099	0.0640915	0.0580789	0.03399	0.025531	0.0188146	0.0148945	0.0528219	0.0146896	0.0544185	0.0281329	0.0358856	0.0359497	0.0106452	0.0424823	0.0195753	0.0426175	0.0270811	0.023948	0.0436975	0.0665523	0.0158406	0.0200709	0.0431525	0.0482718	0.018601	0.0396574	0.0303088	0.0225863	0.0345349	0.0112803	0.019495	0.0361106	0.018593	0.0500048	0.0655659	0.0359216	0.061398	0.0219884	0.0629784	0.0657135	0.0199718	0.0293239	0.0686339	0.0620884	0.020617	0.0479797
All/repeat/mobile_element/Class_I/LTR/Ty1_copia/Ale
All/repeat/mobile_element/Class_I/LTR/Ty1_copia/Alesia
All/repeat/mobile_element/Class_I/LTR/Ty1_copia/Angela	0.029482	0.0202715	0.039045	0.0210757	0.0182914	0.0203389	0.0311029	0.0181215	0.0172697	0.0312348	0.0314405	0.0327881	0.0192567	0.0165777	0.0324385	0.0178882	0.0257555	0.0200267	0.0279927	0.0208875	0.0476569	0.0220696	0.0223674	0.0350416	0.0220194	0.0236138	0.0358278	0.0222693	0.0228734	0.0311286	0.0196298	0.0426179	0.0188426	0.0311208	0.0205002	0.019297	0.0235731	0.0309745	0.0319827	0.0149945	0.0319426	0.0455807	0.0265626	0.0391425	0.0211421	0.0340878	0.0313814	0.0254745	0.0177473
All/repeat/mobile_element/Class_I/LTR/Ty1_copia/Bianca
All/repeat/mobile_element/Class_I/LTR/Ty1_copia/Ikeros	0.0141415	0.0155541	0.015981	0.0153279	0.0152587	0.0158847	0.0153984	0.0155501	0.0156338	0.0163181	0.0158887	0.0151318	0.0157688	0.0157419	0.017436	0.0134306	0.0136951	0.0140445	0.015274	0.0146007	0.0147641	0.015723	0.0152192	0.0149612	0.0143242	0.015325	0.0150454	0.014094	0.0152785	0.0140099	0.0147476	0.0164629	0.0161436	0.0154497	0.0136396	0.0153286	0.0144671	0.0136072	0.0128343	0.0129511	0.0144706	0.0121516	0.0132173	0.0154115	0.0152236	0.0122664	0.014439	0.0143846	0.0142292
All/repeat/mobile_element/Class_I/LTR/Ty1_copia/Ivana
All/repeat/mobile_element/Class_I/LTR/Ty1_copia/SIRE
All/repeat/mobile_element/Class_I/LTR/Ty1_copia/TAR
All/repeat/mobile_element/Class_I/LTR/Ty1_copia/Tork
All/repeat/mobile_element/Class_I/LTR/Ty3_gypsy/chromovirus/CRM
All/repeat/mobile_element/Class_I/LTR/Ty3_gypsy/chromovirus/Galadriel
All/repeat/mobile_element/Class_I/LTR/Ty3_gypsy/chromovirus/Tekay	0.0767028	0.068804	0.0726165	0.0563549	0.058805	0.0592577	0.0596338	0.0619155	0.0584963	0.0494562	0.0645539	0.0685553	0.0570717	0.05745	0.0601738	0.0583478	0.0468199	0.0665215	0.0638488	0.0634543	0.0629043	0.0684944	0.059906	0.0723113	0.070545	0.0872111	0.0725204	0.0731872	0.076068	0.056133	0.0674807	0.0563447	0.0680462	0.0615183	0.0650899	0.0555294	0.0616549	0.0475811	0.0480704	0.0524839	0.0579442	0.0547759	0.0530816	0.070336	0.0568804	0.0514056	0.0508241	0.0524249	0.0589968
All/repeat/mobile_element/Class_I/LTR/Ty3_gypsy/non-chromovirus/OTA/Athila	0.0175942	0.0195212	0.0181421	0.015546	0.017396	0.0201082	0.014848	0.0194131	0.0177096	0.0156724	0.0172707	0.0165181	0.0183164	0.0164245	0.0148461	0.0158602	0.0150049	0.0139958	0.0140834	0.0127003	0.0111763	0.0187765	0.0166987	0.0179556	0.0162988	0.0156883	0.0155035	0.017253	0.0196362	0.0163221	0.0115538	0.018222	0.0195355	0.0151197	0.0158687	0.0189683	0.0196637	0.0156061	0.0174959	0.0149913	0.00826747	0.0141596	0.0162256	0.0154263	0.0175839	0.0137998	0.0142388	0.0150004	0.0173819
All/repeat/mobile_element/Class_I/LTR/Ty3_gypsy/non-chromovirus/OTA/Tat/Ogre
All/repeat/mobile_element/Class_I/LTR/Ty3_gypsy/non-chromovirus/OTA/Tat/Retand	0.0507848	0.0393963	0.0444071	0.0423079	0.0403629	0.0342161	0.0337401	0.033855	0.0377547	0.0432448	0.0400839	0.0430981	0.0367666	0.0323393	0.0344495	0.033053	0.0286256	0.039152	0.0387745	0.043044	0.0496533	0.0466688	0.0511108	0.0546545	0.0520146	0.0440648	0.0427635	0.0498255	0.0434568	0.0455799	0.0446418	0.0409541	0.0361364	0.0497166	0.0435301	0.0382511	0.0330938	0.0346054	0.0356917	0.0353345	0.033634	0.0310155	0.0335877	0.0407152	0.0383206	0.0321662	0.0307297	0.0343733	0.0327413
All/repeat/mobile_element/Class_II/Subclass_1/TIR/EnSpm_CACTA	0.00553027	0.00583473	0.00616686	0.00643438	0.006971	0.00580649	0.00612402	0.00606586	0.0054953	0.00583352	0.00546357	0.00550685	0.00578092	0.00623384	0.00565871	0.00535246	0.00575057	0.00556392	0.00621085	0.00586685	0.00536007	0.00557338	0.00602656	0.0061485	0.00166461	0.00621592	0.00592363	0.00554239	0.00620303	0.00593796	0.00585843	0.00740666	0.00592872	0.00598967	0.003685	0.0062684	0.00681606	0.00615702	0.00451108	0.00603158	0.00540611	0.0046435	0.00533169	0.00571284	0.00582953	0.00447095	0.00627449	0.00686075	0.00631604
All/repeat/mobile_element/Class_II/Subclass_1/TIR/MuDR_Mutator	0.0101943	0.0111263	0.0105497	0.0104677	0.00797707	0.00977974	0.00896916	0.00977333	0.00998603	0.0100466	0.0105202	0.0111788	0.0122674	0.00975636	0.00727413	0.00712925	0.0065371	0.00982855	0.0109633	0.0119818	0.00860023	0.0114039	0.0111479	0.00965975	0.0109698	0.00969779	0.0112068	0.00952062	0.0104318	0.0111757	0.01056	0.0107643	0.00852829	0.00928167	0.00506489	0.00982241	0.0099687	0.00935281	0.00990354	0.00841277	0.00978595	0.00769542	0.00825273	0.00996718	0.00795432	0.00793572	0.00894148	0.00769599	0.0103205
All/repeat/rDNA/45S_rDNA/18S_rDNA
All/repeat/rDNA/45S_rDNA/25S_rDNA
All/repeat/rDNA/5S_rDNA
[truncated: 24 more columns]
